# Supplementary material for: Superior energy storage properties in NaNbO3-based ceramics via synergistically optimizing domain and band structures
Source: Royal Society of Chemistry journal article supplement (doi:10.1039/d2ta02534e), 2022-01-01
Supplement: d2ta02534e1.pdf [file d2ta02534e1.pdf]

1     **Superior energy storage properties in NaNbO<sub>3</sub>-based ceramics via**  
2             **synergistically optimizing domain and band structures**

3  
4     Weiwei Yang<sup>a,b,c</sup>, Huarong Zeng<sup>a,b\*</sup>, Fei Yan<sup>c</sup>, Jinfeng Lin<sup>c</sup>, Guanglong Ge<sup>c</sup>, Yingbo  
5     Cao<sup>c</sup>, Wentong Du<sup>a,b</sup>, Kunyu Zhao<sup>a,b</sup>, Guorong Li<sup>a,b</sup>, Haijiao Xie<sup>d</sup> and Jiwei Zhai<sup>c,\*</sup>

6     <sup>a</sup> *Key Laboratory of Inorganic Functional Materials and Devices, Shanghai Institute*  
7     *of Ceramics, Chinese Academy of Sciences, Shanghai 201899, China*

8     <sup>b</sup> *Center of Materials Science and Optoelectronics Engineering, University of Chinese*  
9     *Academy of Sciences, Beijing 100049, China*

10    <sup>c</sup> *Shanghai Key Laboratory for R&D and Application of Metallic Functional Materials,*  
11    *Functional Materials Research Laboratory, School of Materials Science and*  
12    *Engineering, Tongji University, Shanghai 201804, China*

13    <sup>d</sup> *Hangzhou Yanqu Information Technology Co. Ltd, Xihu District, Hangzhou 310003,*  
14    *China*

15

16

17

18    **Corresponding authors:**

19    Huarong Zeng. E-mail address: [huarongzeng@mail.sic.ac.cn](mailto:huarongzeng@mail.sic.ac.cn)

20    Jiwei Zhai. E-mail address: [apzhai@tongji.edu.cn](mailto:apzhai@tongji.edu.cn)

21

22

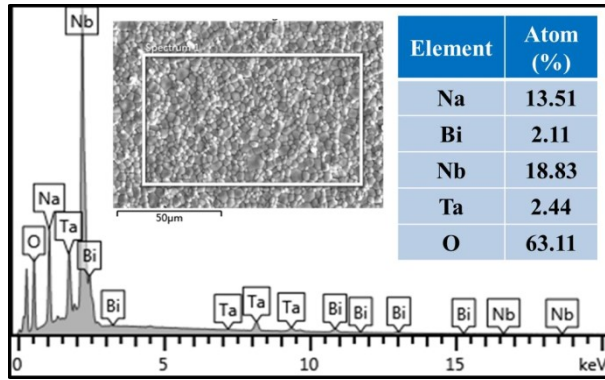

Figure S1 The EDS analysis of the NBNT10 ceramics.

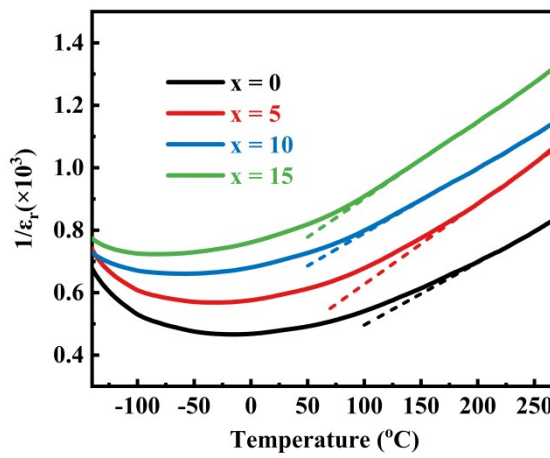

Figure S2 Temperature dependence of the reciprocal of dielectric constant at 10 kHz to determine the  $T_B$  values of the NBNT $x$  ceramics.

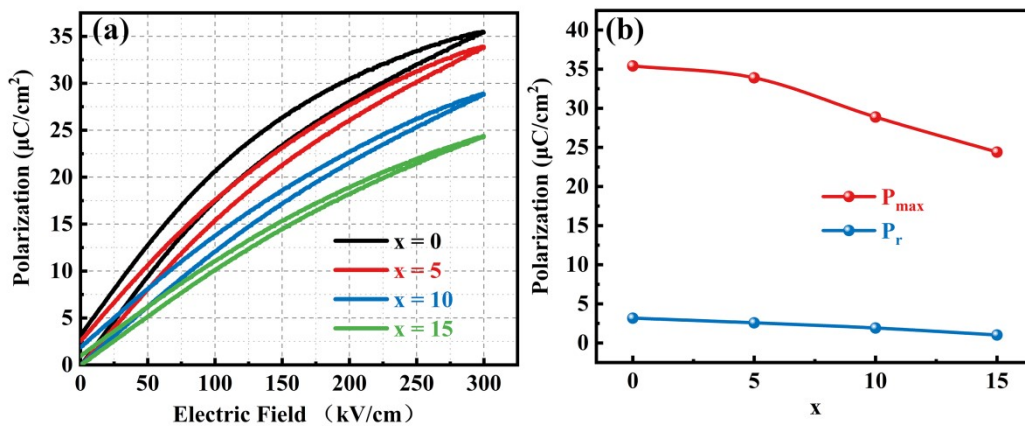

Figure S3 (a) P-E loops of the NBNT $x$  ceramics at 300 kV/cm and 10 Hz; (b) The change of  $P_{max}$  and  $P_r$  with the variation of Ta content.

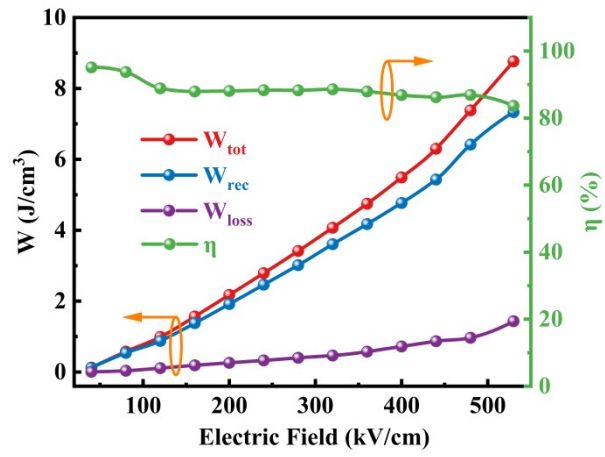

1

2 Figure S4 Energy storage properties of the NBNT10 ceramics at different electric  
 3 fields.
